# Supplementary material for: Commensal bacteria drive endogenous transformation and tumour stem cell marker expression through a bystander effect
Source: PubMed Central journal article supplement — Gut. 2014 Jun 6;64(3):459–68. doi: 10.1136/gutjnl-2014-307213 (PMC4345889; doi:10.1136/gutjnl-2014-307213), 2014-06-06
Supplement: gutjnl-2014-307213-s2.pdf [file gutjnl-2014-307213-s2.pdf]

**Table S1. Differentially expressed genes ( $\geq 2.0$  fold-change) in transformed clones for Ingenuity Pathway Analysis.**

| Symbol*                         | Name                                                                              | Geom mean of intensities in AllExp | Geom mean of intensities in Cntl | Fold-change AllExp v Cntl |
|---------------------------------|-----------------------------------------------------------------------------------|------------------------------------|----------------------------------|---------------------------|
| <a href="#">Ly6a</a>            | lymphocyte antigen 6 complex, locus A (Ly6a)                                      | 3459.91                            | 241.21                           | 14.344                    |
| <a href="#">Cdkn1a</a>          | cyclin-dependent kinase inhibitor 1A (P21) (Cdkn1a)                               | 2653.67                            | 283.33                           | 9.366                     |
| <a href="#">Anxa8</a>           | annexin A8 (Anxa8)                                                                | 1769.99                            | 201.3                            | 8.793                     |
| <a href="#">Anxa8</a>           | annexin A8 (Anxa8)                                                                | 1643.92                            | 201.4                            | 8.162                     |
| <a href="#">Ly6e</a>            |                                                                                   | 7597.81                            | 942.86                           | 8.058                     |
| <a href="#">LOC100038882</a>    | PREDICTED: hypothetical protein LOC100038882 (LOC100038882)                       | 8113.77                            | 1026.19                          | 7.907                     |
| <a href="#">Cdkn1a</a>          | cyclin-dependent kinase inhibitor 1A (P21) (Cdkn1a)                               | 6350.65                            | 810.62                           | 7.834                     |
| <a href="#">Ly6e</a>            | lymphocyte antigen 6 complex, locus E (Ly6e)                                      | 3308.57                            | 428.16                           | 7.727                     |
| <a href="#">Dnali1</a>          |                                                                                   | 847.82                             | 123.07                           | 6.889                     |
| <a href="#">Irf7</a>            | interferon regulatory factor 7 (Irf7)                                             | 1017.71                            | 161.95                           | 6.284                     |
| <a href="#">Oas1g</a>           | 2'-5' oligoadenylate synthetase 1G (Oas1g)                                        | 3235.96                            | 549.33                           | 5.891                     |
| <a href="#">Oas1g</a>           | 2'-5' oligoadenylate synthetase 1G (Oas1g)                                        | 1525.74                            | 297.97                           | 5.120                     |
| <a href="#">Apol9b</a>          | apolipoprotein L 9b (Apol9b)                                                      | 2060.57                            | 403.99                           | 5.101                     |
| <a href="#">Ephx1</a>           | epoxide hydrolase 1, microsomal (Ephx1)                                           | 3226.02                            | 651.91                           | 4.949                     |
| <a href="#">6530402F18Rik</a>   |                                                                                   | 562.92                             | 117.51                           | 4.790                     |
| <a href="#">LOC223672</a>       |                                                                                   | 4372.4                             | 929.09                           | 4.706                     |
| <a href="#">Capg</a>            | capping protein (actin filament), gelsolin-like (Capg), transcript variant 1      | 1175.06                            | 257.51                           | 4.563                     |
| <a href="#">Trp53inp1</a>       | transformation related protein 53 inducible nuclear protein 1 (Trp53inp1)         | 1959.4                             | 452.54                           | 4.330                     |
| <a href="#">Fam134b</a>         | family with sequence similarity 134, member B (Fam134b), transcript variant 2     | 724.96                             | 173.3                            | 4.183                     |
| <a href="#">Bst2</a>            | bone marrow stromal cell antigen 2 (Bst2)                                         | 2738.66                            | 658.89                           | 4.156                     |
| <a href="#">Lgals3</a>          | lectin, galactose binding, soluble 3 (Lgals3)                                     | 7860.48                            | 1921.47                          | 4.091                     |
| <a href="#">Car13</a>           | carbonic anhydrase 13 (Car13)                                                     | 1127.91                            | 300.25                           | 3.757                     |
| <a href="#">2210023G05Rik</a>   | RIKEN cDNA 2210023G05 gene (2210023G05Rik)                                        | 1582.82                            | 423.2                            | 3.740                     |
| <a href="#">Ak1</a>             | adenylate kinase 1 (AK1)                                                          | 961.3                              | 261.58                           | 3.675                     |
| <a href="#">Ccng1</a>           | cyclin G1 (Ccng1)                                                                 | 6384.15                            | 1808.89                          | 3.529                     |
| <a href="#">D12Ertd647e</a>     | DNA segment, Chr 12, ERATO Doi 647, expressed (D12Ertd647e), transcript variant 4 | 7607.3                             | 2428.97                          | 3.132                     |
| <a href="#">D12Ertd647e</a>     | DNA segment, Chr 12, ERATO Doi 647, expressed (D12Ertd647e), transcript variant 5 | 6887.52                            | 2209.86                          | 3.117                     |
| <a href="#">Sqrdl</a>           | sulfide quinone reductase-like (yeast) (Sqrdl)                                    | 510.39                             | 169.95                           | 3.003                     |
| <a href="#">Ifitm3</a>          | interferon induced transmembrane protein 3 (Ifitm3)                               | 11505.6                            | 3864.62                          | 2.977                     |
| <a href="#">A330089M16Rik</a>   |                                                                                   | 345.61                             | 118.59                           | 2.914                     |
| <a href="#">Pde3a</a>           |                                                                                   | 312.92                             | 107.45                           | 2.912                     |
| <a href="#">H2-T23</a>          | histocompatibility 2, T region locus 23 (H2-T23)                                  | 820.86                             | 290.26                           | 2.828                     |
| <a href="#">Irf9</a>            | interferon regulatory factor 9 (Irf9)                                             | 1109.91                            | 401.34                           | 2.766                     |
| <a href="#">Ifitm1</a>          | interferon induced transmembrane protein 1 (Ifitm1)                               | 11647.61                           | 4415.68                          | 2.638                     |
| <a href="#">Coro1b</a>          | coronin, actin binding protein 1B (Coro1b)                                        | 3655.52                            | 1388.93                          | 2.632                     |
| <a href="#">Fxyd5</a>           | FXDY domain-containing ion transport regulator 5 (Fxyd5)                          | 482.22                             | 187.45                           | 2.573                     |
| <a href="#">Lynx1</a>           | Ly6/neurotoxin 1 (Lynx1)                                                          | 333.02                             | 134.73                           | 2.472                     |
| <a href="#">Gsdmdc1</a>         | gasdermin domain containing 1 (Gsdmdc1)                                           | 600.77                             | 247.38                           | 2.429                     |
| <a href="#">Gsdmdc1</a>         | gasdermin domain containing 1 (Gsdmdc1)                                           | 2484.51                            | 1023.12                          | 2.428                     |
| <a href="#">LOC100047963</a>    | PREDICTED: similar to ADIR1 (LOC100047963)                                        | 1338.77                            | 568.37                           | 2.355                     |
| <a href="#">scl0001379.1_70</a> |                                                                                   | 448.96                             | 190.92                           | 2.352                     |

|                               |                                                                                          |         |         |        |
|-------------------------------|------------------------------------------------------------------------------------------|---------|---------|--------|
| <a href="#">LOC100044430</a>  | PREDICTED: similar to Interferon activated gene 205 (LOC100044430)                       | 706.3   | 301     | 2.347  |
| <a href="#">Ifi30</a>         | interferon gamma inducible protein 30 (Ifi30)                                            | 897.22  | 391.25  | 2.293  |
| <a href="#">Ggta1</a>         | glycoprotein galactosyltransferase alpha 1, 3 (Ggta1)                                    | 445.66  | 194.68  | 2.289  |
| <a href="#">Dhrs7</a>         | dehydrogenase/reductase (SDR family) member 7 (Dhrs7)                                    | 1062.82 | 470.24  | 2.260  |
| <a href="#">EG433865</a>      | PREDICTED: predicted gene, EG433865 (EG433865)                                           | 917     | 408.53  | 2.245  |
| <a href="#">St3gal2</a>       | ST3 beta-galactoside alpha-2,3-sialyltransferase 2 (St3gal2), transcript variant 2       | 713.98  | 320.45  | 2.228  |
| <a href="#">Tdrd7</a>         | tudor domain containing 7 (Tdrd7)                                                        | 1442.82 | 649.42  | 2.222  |
| <a href="#">Actb</a>          | actin, beta, cytoplasmic (Actb)                                                          | 2099.32 | 953.95  | 2.201  |
| <a href="#">Mlkl</a>          | mixed lineage kinase domain-like (Mlkl) XM_924589                                        | 2327.26 | 1061.25 | 2.193  |
| <a href="#">Tspo</a>          | translocator protein (Tspo)                                                              | 3682.07 | 1685.41 | 2.185  |
| <a href="#">LOC100047261</a>  | PREDICTED: similar to spermidine/spermine N1-acetyltransferase (LOC100047261), misc RNA. | 2692.75 | 1239.31 | 2.173  |
| <a href="#">Trim47</a>        | tripartite motif-containing 47 (Trim47)                                                  | 532.06  | 246.19  | 2.161  |
| <a href="#">Fbxo6</a>         | F-box protein 6 (Fbxo6)                                                                  | 2408.36 | 1118.16 | 2.154  |
| <a href="#">Actb</a>          | actin, beta (Actb)                                                                       | 1935.11 | 902.48  | 2.144  |
| <a href="#">Ddx60</a>         | DEAD (Asp-Glu-Ala-Asp) box polypeptide 60 (Ddx60)                                        | 301.87  | 141.38  | 2.135  |
| <a href="#">Arsa</a>          | arylsulfatase A (Arsa)                                                                   | 1536.34 | 720.1   | 2.134  |
| <a href="#">LOC100046469</a>  | PREDICTED: similar to Plec1 protein, transcript variant 1 (LOC100046469)                 | 311.62  | 146.43  | 2.128  |
| <a href="#">4732458O05Rik</a> |                                                                                          | 739.23  | 349.99  | 2.112  |
| <a href="#">Klf4</a>          | Kruppel-like factor 4 (gut) (Klf4)                                                       | 511.31  | 244.53  | 2.091  |
| <a href="#">Tspo</a>          | translocator protein (Tspo)                                                              | 3653.66 | 1752.05 | 2.085  |
| <a href="#">Gsdmdc1</a>       | gasdermin domain containing 1 (Gsdmdc1)                                                  | 989.09  | 474.6   | 2.084  |
| <a href="#">Adfp</a>          | adipose differentiation related protein (Adfp)                                           | 495.37  | 238.46  | 2.077  |
| <a href="#">LOC100046469</a>  | PREDICTED: similar to Plec1 protein, transcript variant 1 (LOC100046469)                 | 297.84  | 144.79  | 2.057  |
| <a href="#">Txnip</a>         | thioredoxin interacting protein (Txnip), transcript variant 1                            | 1205.52 | 588.87  | 2.047  |
| <a href="#">Ostf1</a>         | osteoclast stimulating factor 1 (Ostf1)                                                  | 2024.89 | 999.75  | 2.025  |
| <a href="#">Ifi204</a>        | interferon activated gene 204 (Ifi204)                                                   | 526.61  | 261.34  | 2.015  |
| <a href="#">Ifi30</a>         | interferon gamma inducible protein 30 (Ifi30)                                            | 446.48  | 221.79  | 2.013  |
| <a href="#">Txnip</a>         | thioredoxin interacting protein (Txnip), transcript variant 2                            | 2023.78 | 1008.19 | 2.007  |
| <a href="#">Plec1</a>         | plectin 1 (Plec1), transcript variant 11                                                 | 642.3   | 320.33  | 2.005  |
| <a href="#">Avpr1a</a>        | arginine vasopressin receptor 1A (Avpr1a)                                                | 119.45  | 239.23  | -2.003 |
| <a href="#">Stx11</a>         | PREDICTED: syntaxin 11 (Stx11)                                                           | 476.09  | 962.23  | -2.021 |
| <a href="#">LOC674960</a>     | PREDICTED: similar to high-mobility group box 1 (LOC674960), misc RNA.                   | 207.59  | 423.13  | -2.038 |
| <a href="#">Cdh3</a>          |                                                                                          | 236.11  | 481.91  | -2.041 |
| <a href="#">Epha1</a>         | Eph receptor A1 (Epha1)                                                                  | 152.84  | 312.81  | -2.047 |
| <a href="#">9030624G23Rik</a> | PREDICTED: RIKEN cDNA 9030624G23 gene (9030624G23Rik)                                    | 209.44  | 429.74  | -2.052 |
| <a href="#">Odf2</a>          | outer dense fiber of sperm tails 2 (Odf2)                                                | 176.63  | 362.96  | -2.055 |
| <a href="#">Gpr23</a>         |                                                                                          | 120.58  | 248.34  | -2.060 |
| <a href="#">Plac1</a>         | placental specific protein 1 (Plac1)                                                     | 144.78  | 301.93  | -2.085 |
| <a href="#">Rhobtb1</a>       | Rho-related BTB domain containing 1 (Rhobtb1)                                            | 149.14  | 311.12  | -2.086 |
| <a href="#">Dlg3</a>          | discs, large homolog 3 (Drosophila) (Dlg3)                                               | 184.06  | 384.19  | -2.087 |
| <a href="#">Il16</a>          | interleukin 16 (Il16)                                                                    | 119.14  | 248.84  | -2.089 |
| <a href="#">Emb</a>           | embigin (Emb)                                                                            | 112.55  | 235.47  | -2.092 |
| <a href="#">Syng1</a>         | synaptogyrin 1 (Syng1), transcript variant 1b                                            | 131.19  | 274.58  | -2.093 |
| <a href="#">Gstm5</a>         | glutathione S-transferase, mu 5 (Gstm5)                                                  | 645.4   | 1353.64 | -2.097 |
| <a href="#">Ttc28</a>         | PREDICTED: tetratricopeptide repeat domain 28 (Ttc28)                                    | 163.9   | 344.43  | -2.101 |

|                                    |                                                                                    |         |         |        |
|------------------------------------|------------------------------------------------------------------------------------|---------|---------|--------|
| <a href="#">OTTMUSG00000004461</a> | predicted gene, OTTMUSG00000004461 (OTTMUSG00000004461)                            | 283.31  | 596.28  | -2.105 |
| <a href="#">scl0002255.1_1</a>     |                                                                                    | 112.54  | 236.88  | -2.105 |
| <a href="#">lpo5</a>               | importin 5 (lpo5)                                                                  | 734.9   | 1561.97 | -2.125 |
| <a href="#">4932408C11Rik</a>      |                                                                                    | 114.17  | 243.49  | -2.133 |
| <a href="#">Nfib</a>               |                                                                                    | 225.47  | 486.74  | -2.159 |
| <a href="#">0610007N19Rik</a>      | PREDICTED: RIKEN cDNA 0610007N19 gene (0610007N19Rik)                              | 193.4   | 417.94  | -2.161 |
| <a href="#">Odz3</a>               | odd Oz/ten-m homolog 3 (Drosophila) (Odz3)                                         | 201.81  | 440.42  | -2.182 |
| <a href="#">Fez1</a>               | fasciculation and elongation protein zeta 1 (zygin I) (Fez1)                       | 148.41  | 324.42  | -2.186 |
| <a href="#">Gpx7</a>               | glutathione peroxidase 7 (Gpx7)                                                    | 113.21  | 250.59  | -2.213 |
| <a href="#">Spnb2</a>              | spectrin beta 2 (Spnb2), transcript variant 2                                      | 470.32  | 1045.74 | -2.223 |
| <a href="#">Myh10</a>              | myosin, heavy polypeptide 10, non-muscle (Myh10)                                   | 684.26  | 1529.88 | -2.236 |
| <a href="#">5730525O22Rik</a>      |                                                                                    | 430.32  | 969.43  | -2.253 |
| <a href="#">D17H6S56E-5</a>        | DNA segment, Chr 17, human D6S56E 5 (D17H6S56E-5)                                  | 186.87  | 423.51  | -2.266 |
| <a href="#">Ptrpz1</a>             | protein tyrosine phosphatase, receptor type Z, polypeptide 1 (Ptrpz1)              | 125.27  | 284.11  | -2.268 |
| <a href="#">Epm2aip1</a>           | EPM2A (laforin) interacting protein 1 (Epm2aip1)                                   | 264.3   | 600.86  | -2.273 |
| <a href="#">LOC382555</a>          |                                                                                    | 1230.93 | 2813.45 | -2.286 |
| <a href="#">Dmrta2</a>             | doublesex and mab-3 related transcription factor like family A2 (Dmrta2)           | 137.06  | 313.52  | -2.287 |
| <a href="#">AI448196</a>           |                                                                                    | 114.48  | 263.81  | -2.304 |
| <a href="#">Zfp703</a>             | PREDICTED: zinc finger protein 703 (Zfp703)                                        | 391.4   | 902.42  | -2.306 |
| <a href="#">Serping1</a>           |                                                                                    | 119.48  | 276.16  | -2.311 |
| <a href="#">4931406P16Rik</a>      | RIKEN cDNA 4931406P16 gene (4931406P16Rik)                                         | 677.59  | 1572.48 | -2.321 |
| <a href="#">scl0002507.1_236</a>   |                                                                                    | 200.88  | 468.46  | -2.332 |
| <a href="#">Gpc2</a>               | glypican 2 (cerebroglycan) (Gpc2)                                                  | 120.71  | 283.55  | -2.349 |
| <a href="#">B3galnt1</a>           | UDP-GalNAc:betaGlcNAc beta 1,3-galactosaminyltransferase, polypeptide 1 (B3galnt1) | 116.04  | 273.84  | -2.360 |
| <a href="#">Jam3</a>               | junction adhesion molecule 3 (Jam3)                                                | 174.99  | 412.96  | -2.360 |
| <a href="#">Trim27</a>             |                                                                                    | 164.85  | 390.33  | -2.368 |
| <a href="#">C130020C13Rik</a>      |                                                                                    | 290.18  | 688.75  | -2.374 |
| <a href="#">Id4</a>                | inhibitor of DNA binding 4 (Id4)                                                   | 137.36  | 326.52  | -2.377 |
| <a href="#">1700007G11Rik</a>      | RIKEN cDNA 1700007G11 gene (1700007G11Rik)                                         | 135.21  | 322.38  | -2.384 |
| <a href="#">Fez1</a>               | fasciculation and elongation protein zeta 1 (zygin I) (Fez1)                       | 139.52  | 333.3   | -2.389 |
| <a href="#">HnrpdI</a>             | heterogeneous nuclear ribonucleoprotein D-like (HnrpdI)                            | 738.22  | 1799.3  | -2.437 |
| <a href="#">Cd276</a>              | CD276 antigen (Cd276)                                                              | 166.19  | 406.02  | -2.443 |
| <a href="#">Stard10</a>            | START domain containing 10 (Stard10)                                               | 307.04  | 757.47  | -2.467 |
| <a href="#">6330406I15Rik</a>      | RIKEN cDNA 6330406I15 gene (6330406I15Rik)                                         | 166.71  | 412.7   | -2.476 |
| <a href="#">6330406I15Rik</a>      | RIKEN cDNA 6330406I15 gene (6330406I15Rik)                                         | 195.57  | 495.49  | -2.534 |
| <a href="#">Tacstd2</a>            | tumor-associated calcium signal transducer 2 (Tacstd2)                             | 153.81  | 392.36  | -2.551 |
| <a href="#">Cirbp</a>              | cold inducible RNA binding protein (Cirbp)                                         | 409.68  | 1074.94 | -2.624 |
| <a href="#">scl0003131.1_3</a>     |                                                                                    | 153.72  | 423.07  | -2.752 |
| <a href="#">1110003F05Rik</a>      |                                                                                    | 157.63  | 437.68  | -2.777 |
| <a href="#">Gstk1</a>              | glutathione S-transferase kappa 1 (Gstk1)                                          | 139.38  | 389.34  | -2.793 |
| <a href="#">Wipf1</a>              | WAS/WASL interacting protein family, member 1 (Wipf1)                              | 136.35  | 393.6   | -2.887 |
| <a href="#">Serping1</a>           | serine (or cysteine) peptidase inhibitor, clade G, member 1 (Serping1)             | 121.56  | 353.11  | -2.905 |
| <a href="#">LOC226017</a>          |                                                                                    | 117.03  | 345.25  | -2.950 |
| <a href="#">Tagln</a>              | transgelin (Tagln)                                                                 | 166.59  | 493.83  | -2.964 |
| <a href="#">Capn6</a>              | calpain 6 (Capn6)                                                                  | 128.03  | 383.66  | -2.997 |
| <a href="#">MyI9</a>               | PREDICTED: myosin, light polypeptide 9, regulatory (MyI9)                          | 129.58  | 390.16  | -3.011 |
| <a href="#">Mex3a</a>              | mex3 homolog A (C. elegans) (Mex3a)                                                | 213.27  | 654.17  | -3.067 |

|                               |                                                                                      |         |         |         |
|-------------------------------|--------------------------------------------------------------------------------------|---------|---------|---------|
| <a href="#">SrpX</a>          | sushi-repeat-containing protein (SrpX)                                               | 109.82  | 341.53  | -3.110  |
| <a href="#">Ddx25</a>         | DEAD (Asp-Glu-Ala-Asp) box polypeptide 25 (Ddx25)                                    | 148.63  | 463.87  | -3.121  |
| <a href="#">Hal</a>           | histidine ammonia lyase (Hal)                                                        | 137.09  | 432.99  | -3.158  |
| <a href="#">Zfp521</a>        | zinc finger protein 521 (Zfp521), transcript variant 2                               | 141.01  | 447.51  | -3.174  |
| <a href="#">Igf2bp3</a>       |                                                                                      | 183.29  | 607.5   | -3.314  |
| <a href="#">Runx1t1</a>       | runt-related transcription factor 1; translocated to, 1 (cyclin D-related) (Runx1t1) | 130.59  | 436.55  | -3.343  |
| <a href="#">ORF63</a>         | open reading frame 63 (ORF63)                                                        | 151.84  | 521.34  | -3.433  |
| <a href="#">Nid2</a>          | nidogen 2 (Nid2)                                                                     | 172.18  | 601.87  | -3.496  |
| <a href="#">9430052C07Rik</a> |                                                                                      | 199.83  | 728.58  | -3.646  |
| <a href="#">Mdk</a>           | midkine (Mdk), transcript variant 3                                                  | 129.78  | 473.63  | -3.649  |
| <a href="#">Dlk1</a>          | delta-like 1 homolog (Drosophila) (Dlk1)                                             | 118.1   | 439.12  | -3.718  |
| <a href="#">Gstk1</a>         | glutathione S-transferase kappa 1 (Gstk1)                                            | 164.83  | 617.04  | -3.743  |
| <a href="#">Asphd2</a>        | aspartate beta-hydroxylase domain containing 2 (Asphd2)                              | 138.1   | 524.37  | -3.797  |
| <a href="#">Igf2</a>          | insulin-like growth factor 2 (Igf2)                                                  | 143.14  | 552.37  | -3.859  |
| <a href="#">Serpinf1</a>      | serine (or cysteine) peptidase inhibitor, clade F, member 1 (Serpinf1)               | 178.21  | 688.69  | -3.864  |
| <a href="#">Grb10</a>         |                                                                                      | 1774.18 | 7351.32 | -4.144  |
| <a href="#">Gm22</a>          | PREDICTED: gene model 22, (NCBI) (Gm22)                                              | 153.24  | 638.28  | -4.165  |
| <a href="#">Fgf5</a>          | fibroblast growth factor 5 (Fgf5)                                                    | 505.61  | 2138    | -4.229  |
| <a href="#">Armxc1</a>        | armadillo repeat containing, X-linked 1 (Armxc1)                                     | 135.78  | 578.19  | -4.258  |
| <a href="#">Podxl2</a>        | podocalyxin-like 2 (Podxl2)                                                          | 128.65  | 565.65  | -4.397  |
| <a href="#">Limch1</a>        | LIM and calponin homology domains 1 (Limch1)                                         | 121     | 575.33  | -4.755  |
| <a href="#">6330404C01Rik</a> |                                                                                      | 140.77  | 692.04  | -4.916  |
| <a href="#">1700048O20Rik</a> |                                                                                      | 137.09  | 681.52  | -4.971  |
| <a href="#">Prkg1</a>         |                                                                                      | 137.04  | 725.13  | -5.291  |
| <a href="#">Zic1</a>          | zinc finger protein of the cerebellum 1 (Zic1)                                       | 140     | 822.89  | -5.878  |
| <a href="#">EG433229</a>      | PREDICTED: predicted gene, EG433229, transcript variant 7 (EG433229)                 | 165.76  | 1010.61 | -6.097  |
| <a href="#">Mmp2</a>          | matrix metalloproteinase 2 (Mmp2)                                                    | 339.09  | 2992.32 | -8.825  |
| <a href="#">Sfrp2</a>         | secreted frizzled-related protein 2 (Sfrp2)                                          | 329.33  | 4098.72 | -12.446 |
| <a href="#">Cxcl12</a>        | chemokine (C-X-C motif) ligand 12 (Cxcl12), transcript variant 3                     | 138.6   | 1903.43 | -13.733 |
| <a href="#">Cxcl12</a>        | chemokine (C-X-C motif) ligand 12 (Cxcl12), transcript variant 1                     | 127.73  | 3105.6  | -24.314 |
| <a href="#">Ptn</a>           | pleiotrophin (Ptn)                                                                   | 120.37  | 5835.39 | -48.479 |
| <a href="#">Cxcl12</a>        |                                                                                      | 137.3   | 9349    | -68.092 |

\*Highlighted genes were identified with multiple probes.
