# Supplementary material for: Commensal bacteria drive endogenous transformation and tumour stem cell marker expression through a bystander effect
Source: PubMed Central journal article supplement — Gut. 2014 Jun 6;64(3):459–68. doi: 10.1136/gutjnl-2014-307213 (PMC4345889; doi:10.1136/gutjnl-2014-307213), 2014-06-06
Supplement: gutjnl-2014-307213-s3.pdf [file gutjnl-2014-307213-s3.pdf]

**Table S2. Gene networks for differentially expressed genes in transformed clones by Ingenuity Pathway Analysis.**

| ID | Molecules in Network                                                                                                                                                                                                                                                                                                                                   | Score* | No. of Focus           |                                                                                                   |
|----|--------------------------------------------------------------------------------------------------------------------------------------------------------------------------------------------------------------------------------------------------------------------------------------------------------------------------------------------------------|--------|------------------------|---------------------------------------------------------------------------------------------------|
|    |                                                                                                                                                                                                                                                                                                                                                        |        | Molecules <sup>§</sup> | Top Functions                                                                                     |
| 1  | BST2, CD276, CIRBP, Cxcl12, DLK1, ERK1/2, FEZ1, HAL, IFI30, Ifi204 (includes others), IFITM1, IFITM2, Ifn, IFN alpha/beta, IFN Beta, IFN type 1, Immunoglobulin, Interferon alpha, IRF7, IRF9, JAM3, LGALS3, Ly6a (includes others), LY6E, MDK, MHC Class I (complex), NID2, OAS1, Pro-inflammatory Cytokine, PTN, PTPRZ1, SERPINF1, TAGLN, TCF, TDRD7 | 53     | 25                     | Infectious Disease, Cardiovascular System Development and Function, Cell Morphology               |
| 2  | ACTB, Actin, Akt, Alp, Alpha catenin, CAPG, CCNG1, CDH3, Collagen type IV, Collagen(s), Cyclin E, F Actin, FGF5, FXYD5, GRB10, Growth hormone, IGF2, KLF4, Laminin, LDL, MMP2, MYH10, MYL9, NFAT (complex), Notch, OSTF1, Pdgf (complex), PDGF BB, PLAC1, PRKG1, Rock, SERPING1, TACSTD2, Tgf beta, WIPF1                                              | 35     | 18                     | Organ Morphology, Reproductive System Development and Function, Cellular Growth and Proliferation |
| 3  | Ap1, caspase, CD3, CDKN1A, Cg, Ck2, Creb, Cyclin A, cytochrome C, DDX25, EMB, estrogen receptor, FSH, glutathione peroxidase, GPX7, GSTK1, GSTM3, Hdac, Histone h3, Histone h4, ID4, IGF2BP3, Igm, IL16, MLKL, NFkB (complex), PDE3A, PI3K (complex), Rb, RUNX1T1, SFRP2, STARD10, TP53INP1, TSPO, TXNIP                                               | 32     | 17                     | Cell Cycle, Connective Tissue Development and Function, Inflammatory Disease                      |
| 4  | AGRN, Apol9a/Apol9b, ARMCX5-GPRASP2/GPRASP2, BST2, CRIPT, CSTA, DDX60, DLG3, EPHA1, EPHX1, EPM2AIP1, GLI2, HTR4, IFI35, IFI44, IPO5, MSX2, N4BP3, NFIB, PARP12, PLAC8, PODXL2, PSMB10, PTH1R, RHOBTB1, S100A11, SQRDL, TAF1D, TPX2, TRIM24, TRIM47, UBC, ZIC1, ZIC2, ZNF521                                                                            | 28     | 15                     | Cancer, Embryonic Development, Nervous System Development and Function                            |
| 5  | AGRN, AK1, ANXA8L2 (includes others), APP, ARSA, BLOC1S1, calpain, CAPN6, CASP3, chondroitin sulfate A, Cxcl12, DHRS7, DMRTA2, DNALI1, EIF3F, ENG, ESR1, FAM3B, FBXO6, FKBPL, HNRPD, IL16, Ly6a (includes others), MEX3A, NRP1, PABPC1, PRTN3, RYR1, SRPX, STC2, SUZ12, TCN2, TGFB1, TLL1, ZNF703                                                      | 26     | 15                     | Cellular Movement, Hematological System Development and Function, Immune Cell Trafficking         |
| 6  | androstenediol, APP, ARMCX1, B3GALNT1, BCL2, BMPR2, C4orf22, CCR2, CDH13, CDK4, CLDN3, CTSF, Cxcl12, ENG, ENO2, ESR2, FAM134B, GADD45G, HAVCR2, LIMCH1, LUC7L2, LYNX1, MDK, MMP15, NFKBIA, NQO2, NRP1, ODF2, progesterone, RASSF3, ST3GAL2, SYNGR1, TP53BP2, Ttc28, UBQLN1                                                                             | 20     | 12                     | Hematological System Development and Function, Tissue Morphology, Cellular Movement               |
| 7  | ADAM10, ADD2, AVPR1A, CCR2, CORO1B, CSF3R, ERK, Focal adhesion kinase, FTL, Ggta1, HLA-E, HTR4, IgG, IL1, IL16, Insulin, Jnk, Ly6a (includes others), Mapk, NRP1, P38 MAPK, Pkc(s), PTPRZ1, Rap1, Ras, Ras homolog, RYR1, S100A12, Sos, SP7, STX11, TCR, TRIM27, Ubiquitin, Vegf                                                                       | 14     | 9                      | Infectious Disease, Cell Morphology, Hematological System Development and Function                |
| 8  | GPC2, GSTP1                                                                                                                                                                                                                                                                                                                                            | 2      | 1                      | Cancer, Lipid Metabolism, Small Molecule Biochemistry                                             |

**\*Score:** The score is derived from a p-value and indicates the likelihood of the Focus Molecules in a network being found together due to random chance. A score of 2 indicates that there is a 1 in 100 chance that the Focus Molecules are together in a network due to random chance. Therefore, scores of 2 or higher have at least a 99% confidence of not being generated by random chance alone (Long et al., *In Silico Biol.* 2004, 4: 0033).

**§Focus Molecules:** Molecules that are from uploaded list, pass filters are applied, and are available for generating networks.
